# Supplementary material for: Combining Vascular Normalization with an Oncolytic Virus Enhances Immunotherapy in a Preclinical Model of Advanced-Stage Ovarian Cancer
Source: Oxford University Press journal article supplement (doi:10.1158/1078-0432.ccr-18-0220), 2018-09-11
Supplement: 10780432ccr180220-sup-195798_3_supp_5013581_psnfsc.docx [file 10780432ccr180220-sup-195798_3_supp_5013581_psnfsc.docx]

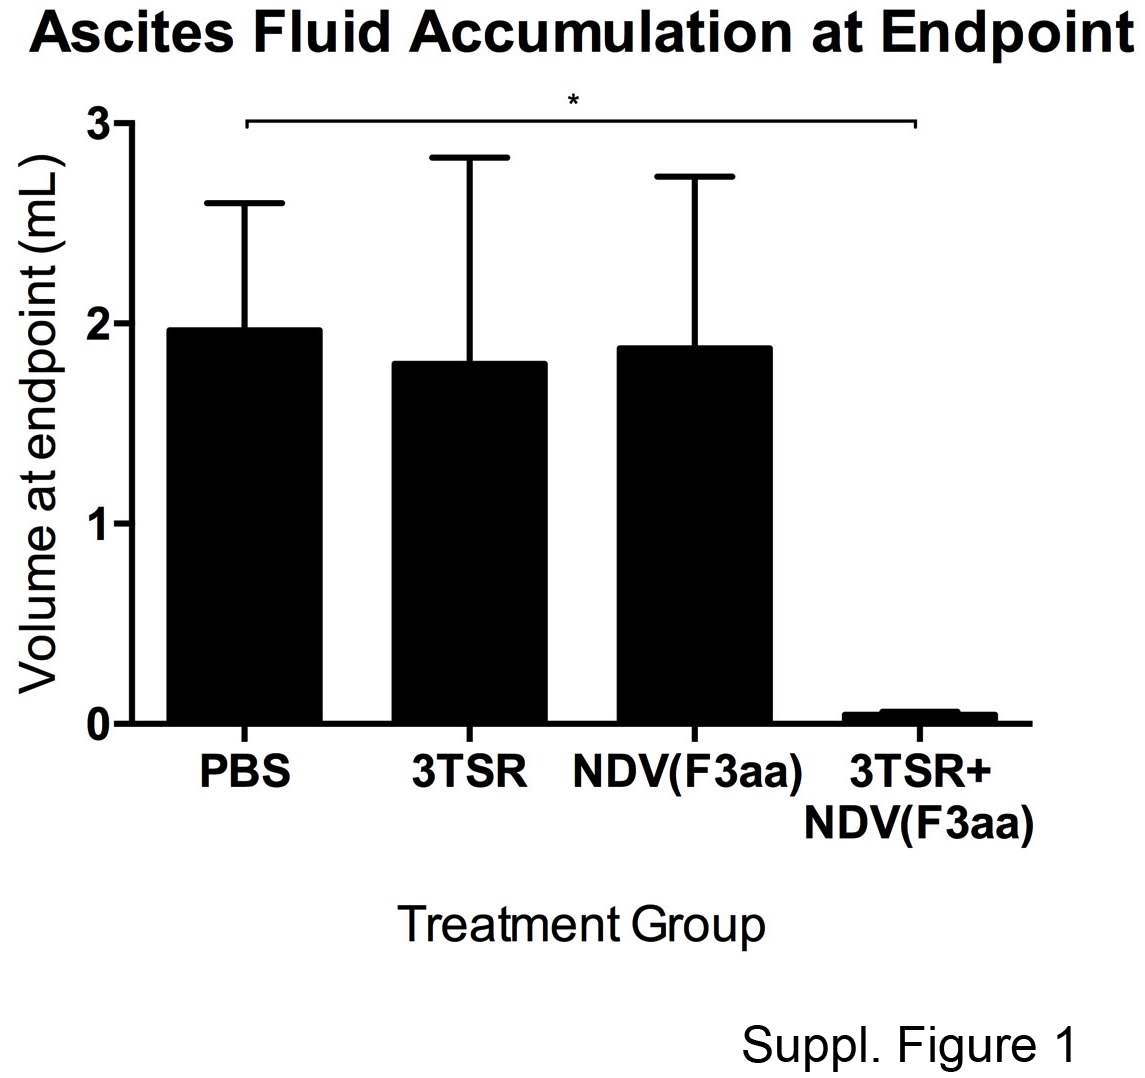


**Supplementary Data, Figure 1**. Combination therapy results in decreased ascites fluid volume. At euthanasia, ascites fluid was aspirated from the abdomen of control and treated mice and the volume was quantified. Combined treatment with 3TSR and NDV(F3aa) resulted in a significant reduction in ascites volume compared to controls or other treatment groups. Means+/- SEM are shown. Data represents results from N=12 animals per experimental group. Data were analyzed by one-way analysis of variance with Tukey’s multiple comparison test; *P<0.05.
